# Supplementary material for: First-in-human topical microbiome transplantation with Roseomonas mucosa for atopic dermatitis
Source: JCI journal article supplement (doi:10.1172/jci.insight.120608), 2018-05-02
Supplement: sd1 [file 1]

750 Supplemental Figure 1  
751

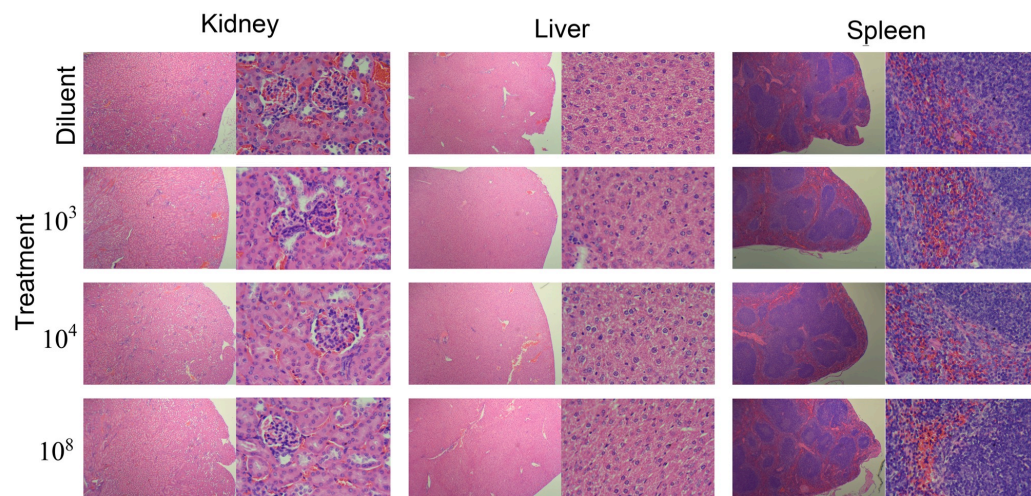

752  
753  
754  
755  
756  
757  
758  
759  
760  
761  
762  
763

**Intravenous injection of *R. mucosa* is non-toxic in mice.** Wild type (C57BL/6) mice were injected with diluent or *R. mucosa* IV at  $10^3$ ,  $10^4$ , or  $10^8$  CFU in 100mcL of volume. Weights and activities were monitored daily for 10 days. On day 10 the kidney, liver, and spleen were harvested and compared histologically (N = 5 mice per group). Representative images from one mouse per group at both 4x and 20x magnification are shown. Studies were conducted with the therapeutic *R. mucosa* strains included in the clinical trial as well as ATCC BAA-692.

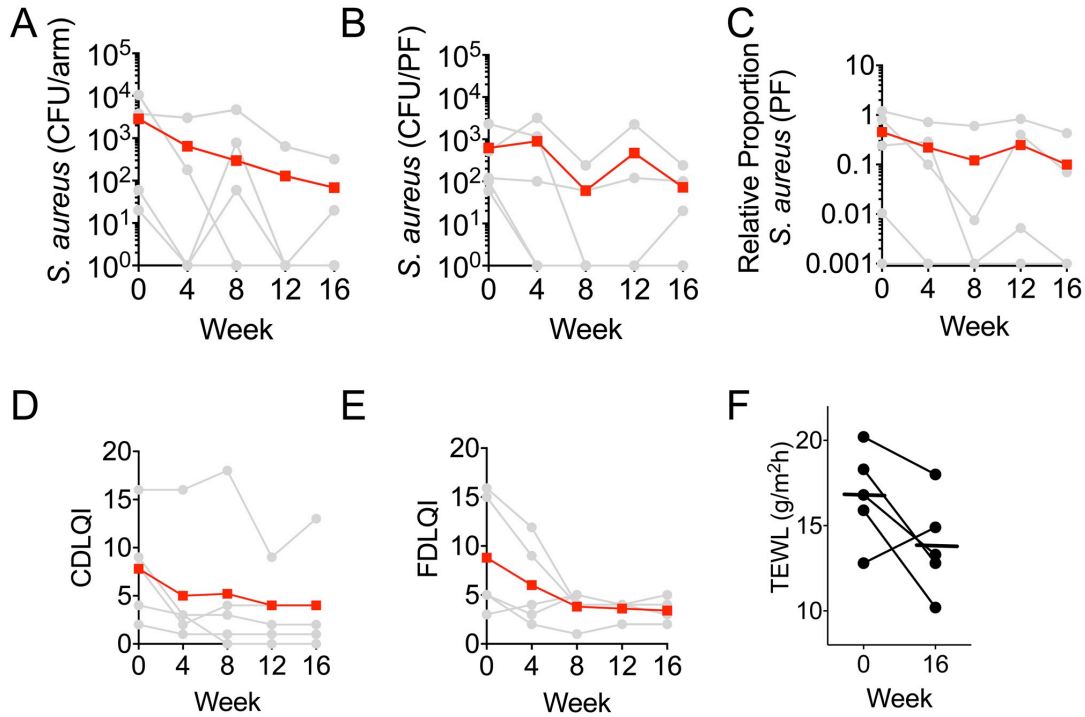

767  
768  
769 ***R. mucosa* treatment secondary measurements.** (A-B) *S. aureus* burden for antecubital (A)  
770 and popliteal (PF; B) fossae. (C) Ratio of *S. aureus* to coagulase negative *staphylococci* for the  
771 popliteal fossae during treatment. (D-E) Mean (scarlet) and individual (gray) values for the  
772 Children's (D) and Family (E) Dermatology Quality Life Index (CDLQI and FDLQI) are shown.  
773 (F) Mean (lines) and individual (dots) of trans-epidermal water loss (TEWL) measurements at  
774 enrollment (week 0) and post-treatment (week 16).  
775  
776

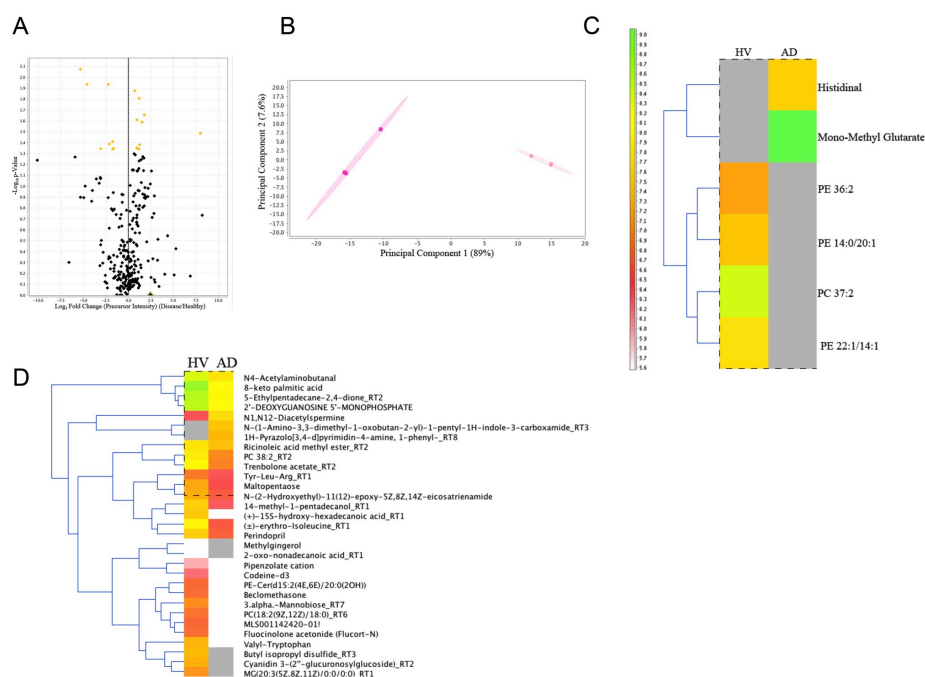

779  
780  
781  
782 **Metabolic profiles from strains of *R. mucosa* differ in ways consistent with atopic**  
783 **dermatitis pathology.** Bacterial pellets from three strains from healthy volunteers (HV)  
784 and three from patients with atopic dermatitis (AD) were grown to mid-exponential phase, pelleted,  
785 frozen, and sent for metabolomic comparison by RPLC (A-C) or HILIC (D). (A) Volcano plot  
786 of significance vs. fold-change for differentiating metabolites. Yellow dots indicate significant  
787 differences prior to family-wise error rate (FWER) adjustment. (B) Principal component analysis  
788 for the six strains (HV strains dark pink, AD strains light pink). (C) Heat map for log<sub>10</sub>  
789 transformed peak area counts of metabolites statistically significant after FWER adjustment. (D)  
790 As in C, using HILIC prior to FWER adjustment. PE = phosphatidylethanolamine, PC =  
791 phosphatidylcholine. Gray indicates no mass spec signal seen for the indicated metabolite in any  
792 of the three isolates tested. Full dataset uploaded to Metabolomics Workbench.  
793

727 **Table S1: Treatment related and emergent unexpected problems and adverse events**

|                                               | Adult cohort (n=10) | Pediatric cohort (n=5) |
|-----------------------------------------------|---------------------|------------------------|
| Treatment-related unexpected problems*, n (%) |                     |                        |
| Application site pruritus                     | 0                   | 1 (20)                 |
| Treatment-related adverse events§, n          |                     |                        |
| Application site pruritus                     | 0                   | 0                      |
| Application site pain                         | 0                   | 0                      |
| Fever                                         | 0                   | 0                      |
| Discoloration                                 | 0                   | 0                      |
| Worsening pruritus                            | 0                   | 0                      |
| Worsening SCORAD                              | 0                   | 0                      |
| Infection, skin                               | 0                   | 0                      |
| Infection, other                              | 0                   | 0                      |
| Injury                                        | 0                   | 0                      |
| Headache                                      | 0                   | 0                      |
| Cough                                         | 0                   | 0                      |
| Lab abnormalities (see methods)               | 0                   | 0                      |
| Treatment-emergent adverse events#, n         | 0                   | 0                      |

728 \*Problems related to therapy by timing; self-limited and did not interfere with patient's daily  
 729 activities or treatment compliance.

730 §Problems related to therapy by timing; persistent and/or interfering with patient's daily  
 731 activities or treatment compliance.

732 #Problems related to therapy by timing; requiring any medical intervention.

733

| Demographics Adult Cohort |     |     |      | Intake SCORAD |      | PMHx      | Home AD Regimen | Antecubital SCORAD |       |           | Pruritus |       |        | FHx |
|---------------------------|-----|-----|------|---------------|------|-----------|-----------------|--------------------|-------|-----------|----------|-------|--------|-----|
| Patient                   | Sex | Age | Race | Pre           | Post |           |                 | Pre                | Post  | Change    | Pre      | Post  | Change |     |
| 1                         | F   | 43  | W    | 27.9          |      | AR        | E, CS           | 11                 | 9     | -18%      | 8        | 6     | -25%   | Y   |
| 2                         | F   | 31  | H    | 27.4          |      | AR        | E, CS           | 10                 | 1     | -90%      | 5        | 0     | -100%  | N   |
| 3                         | F   | 34  | A    | 33.6          |      | FA        | E, CS, AH       | 17                 | 6     | -65%      | 10       | 4     | -60%   | N   |
| 4                         | F   | 40  | W    | 21.2          |      | --        | E, CS           | 5                  | 0     | -100%     | 8        | 0     | -100%  | N   |
| 5                         | F   | 65  | W    | 11.9          |      | Dyslipid. | E               | 5                  | 0     | -100%     | 4        | 0     | -100%  | Y   |
| 6                         | F   | 70  | W    | 16.2          |      | CD, DA    | E, CS, AH, Ω3   | 4                  | 0     | -100%     | 2        | 0     | -100%  | N   |
| 7                         | M   | 19  | H    | 58.9          |      | AS        | E, CS           | 15                 | 4     | -73%      | 5        | 1     | -80%   | N   |
| 8                         | F   | 43  | W    | 40.1          |      | --        | E, CS           | 13                 | 12    | -8%       | 5        | 4     | -20%   | Y   |
| 9                         | F   | 19  | A    | 17.2          |      | --        | E, CS           | 4                  | 4     | 0%        | 2        | 0     | -100%  | U   |
| 10                        | F   | 55  | W    | 40.5          |      | FA        | E, CS, CI       | 9                  | 5     | -44%      | 3        | 0     | -100%  | N   |
| <i>Mean</i>               |     |     |      | 29.5          |      | --        | --              | 9.3                | 4.1** | -59.8%*** | 5.1      | 1.6** | -78.5% | --  |

  

| Demographics Pediatric Cohort |     |     |      | IgE  |      | PMHx       | Home AD Regimen | SCORAD |       |        | Pruritus |       |        | FHx |
|-------------------------------|-----|-----|------|------|------|------------|-----------------|--------|-------|--------|----------|-------|--------|-----|
| Patient                       | Sex | Age | Race | Pre  | Post |            |                 | Pre    | Post  | Change | Pre      | Post  | Change |     |
| P1                            | F   | 9   | W    | 26.2 | 16.8 | AR         | E, CS, AH       | 12.8   | 7.9   | -38.3% | 3.5      | 1     | -71.4% | Y   |
| P2                            | M   | 14  | W    | 381  | 360  | FA         | E, CS, AH       | 34.3   | 16.1  | -53.1% | 8        | 3     | -62.5% | N   |
| P3                            | F   | 10  | W    | 1163 | 1256 | AS, FA, AR | E, CS, AH       | 37.7   | 0     | -100%  | 7.5      | 0     | -100%  | N   |
| P4                            | F   | 10  | H    | 4.5  | 3.9  | AS, AR     | E, CS           | 23.3   | 0     | -100%  | 7.5      | 0     | -100%  | N   |
| P5                            | F   | 9   | W    | 6920 | 4855 | AS, FA, AR | E, CS, AH       | 48.1   | 19.1  | -60.3% | 5        | 2     | -60%   | N   |
| <i>Mean</i>                   |     |     |      | 8495 | 6492 | --         | --              | 31.2   | 8.62* | -70.3% | 6.3      | 1.2** | -78.8% | --  |

734

735

736 **Table S2: Patient demographics and treatment response.** Demographic, past medical history  
737 (PMHx), home regimen, pre and post-treatment antecubital SCORAD values, subjective pruritus  
738 scores, presence of family history of AD persisting into adulthood (FHx) are shown for all  
739 participants. A = asthma, FA = food allergy, AR = allergic rhinitis, CD = contact dermatitis, DA  
740 = drug allergy, Dislipid = dyslipidemia. E = emollients, CS = corticosteroids, AH =  
741 antihistamine, Ω3 = omega-3 fatty acid, and CI = calcineurin inhibitors. W = white/Caucasian, H  
742 = Hispanic, and A = Asian or Asian Pacific Islander. F = female, M = male, Y = yes, N = no, U  
743 = unknown. Note, pruritus scores indicate reported score for total body while antecubital  
744 SCORAD represents objective intensity plus pruritus score for antecubital region only.  
745 Statistical significance in pre- versus post-treatment values determined by two-tailed Student t  
746 test and non-parametric Wilcoxon matched-pairs. \* = p value <0.05, \*\* = p value <0.01, \*\*\* = p  
747 < 0.001.

748

749
